# Supplementary material for: In vitro susceptibility profile of Plasmodium falciparum clinical isolates from Ghana to antimalarial drugs and polymorphisms in resistance markers
Source: PubMed Central journal article supplement (PMC9614232; doi:10.3389/fcimb.2022.1015957), 2022-10-14
Supplement: DataSheet_1.pdf [file DataSheet_1.pdf]

**Table S1.** Primers used in this study

| Gene             |                | primers | Reference                        |   |
|------------------|----------------|---------|----------------------------------|---|
| <i>pfkelch13</i> | <i>kelch13</i> | FWD     | TATAACAAGGCGTAAATATTCGTG         | 1 |
|                  |                | REV     | TGTGCATGAAAATAAATATTTAAAGAAG     |   |
| <i>pfert</i>     | crt-nest1      | FWD     | CCGTTAATAATAAATACACGCAG          | 2 |
|                  |                | REV     | CGGATGTTACAAAACCTATAGTTACC       |   |
|                  | crt-nest2      | FWD     | TGTGCTCATGTGTTTAAACTT            |   |
|                  |                | REV     | CAAACTATAGTTACCAATTTTG           |   |
| <i>pfmdr1</i>    | mdr1(1)-nest1  | FWD     | TTAAATGTTTACCTGCACAACATAGAAAATT  | 3 |
|                  |                | REV     | CTCCACAATAACTTGCAACAGTTCTTA      |   |
|                  | mdr1(1)-nest2  | FWD     | TGTATGTGCTGTATTATCAGGA           |   |
|                  |                | REV     | CTCTTCTATAATGGACATGGTA           |   |
|                  | mdr1(2)-nest1  | FWD     | AATTTGATAGAAAAGCTATTGATTATAA     |   |
|                  |                | REV     | TATTTGGTAATGATTTCGATAAATTCATC    |   |
|                  | mdr1(2)-nest2  | FWD     | GAATTATTGTAAATGCAGCTTTA          |   |
|                  |                | REV     | GCAGCAAACCTACTAACACG             |   |
| <i>pfdhfr</i>    | dhfr-nest1     | FWD     | GCGGGATCCATGATGGAACAAGTCTGCGAC   | 4 |
|                  |                | REV     | GCGAAGCTTTTAAGCAGCCATATCCATTGAAA |   |
|                  | dhfr-nest2     | FWD     | GCGGGATCCATGATGGAACAAGTCTGCGAC   |   |
|                  |                | REV     | GCGAAGCTTACACCTACTCCCGTTTCGATC   |   |
| <i>pfdhps</i>    | dhps-nest1     | FWD     | GCGGAGCTCATGGAACTATAACAAGAACTAAT | 4 |
|                  |                | REV     | GCGAAGCTTGTATATAAACATCTGATGGTAT  |   |
|                  | dhps-nest2     | FWD     | GCGGAGCTCATGATACCCGAATATAAGCATA  |   |
|                  |                | REV     | GCGAAGCTTTTACACTTGGTCTATTTTTGTTA |   |
| <i>pfgch1</i>    | <i>gch1</i>    | FWD     | ATGAAACACATAATATGGAAGAAAAA       | 5 |
|                  |                | REV     | TCCTTTTCATCTATCACAACAAGG         |   |
|                  | seryl-tRNA     | FWD     | AAGTAGCAGGTCATCGTGGTT            |   |
|                  |                | REV     | TTCGGCACATTCTTCCATAA             |   |

- 1 Wang, Z. *et al.* Prevalence of K13-propeller polymorphisms in *Plasmodium falciparum* from China-Myanmar border in 2007-2012. *Malar J* **14**, 168, doi:10.1186/s12936-015-0672-9 (2015).
- 2 Zhou, R. M. *et al.* Molecular mutation profile of *pfert* in *Plasmodium falciparum* isolates imported from Africa in Henan province. *Malar J* **15**, 265, doi:10.1186/s12936-016-1306-6 (2016).
- 3 Li, J. *et al.* Molecular mutation profile of *Pfprt* and *Pfmdr1* in *Plasmodium falciparum* isolates from Bioko Island, Equatorial Guinea. *Infect Genet Evol* **36**, 552-556, doi:10.1016/j.meegid.2015.08.039 (2015).
- 4 Garg, S. *et al.* Novel point mutations in sulfadoxine resistance genes of *Plasmodium falciparum* from India. *Acta Trop* **110**, 75-79, doi:10.1016/j.actatropica.2009.01.009 (2009).
- 5 Osei, M. *et al.* Amplification of GTP-cyclohydrolase 1 gene in *Plasmodium falciparum* isolates with the quadruple mutant of dihydrofolate reductase and dihydropteroate synthase genes in Ghana. *PLoS One* **13**, e0204871, doi:10.1371/journal.pone.0204871 (2018).

**Table S2.** The *gch1* gene copy number of Ghanaian isolates and the standard laboratory strains Dd2 and 3D7

| Sample | <i>gch1</i><br>Copy number |
|--------|----------------------------|
| Dd2    | 2.62                       |
| 3D7    | 3.22                       |
| 16-59  | 0.55                       |
| 16-60  | 3.04                       |
| 16-62  | 0.80                       |
| 16-91  | 0.47                       |
| 16-97  | 2.85                       |
| 16-99  | 2.88                       |
| 16-104 | 0.63                       |
| 16-105 | 0.72                       |
| 16-113 | 0.42                       |
| 16-114 | 0.63                       |
| 16-129 | 0.35                       |
| 16-136 | 0.31                       |
| 16-137 | 0.62                       |
| 16-140 | 0.87                       |
| 16-148 | 0.85                       |
| 16-166 | 1.01                       |
| 17-30  | 0.95                       |
| 17-53  | 0.31                       |
| 17-89  | 1.07                       |
| 17-107 | 3.15                       |
| 17-108 | 0.60                       |
| 17-132 | 0.72                       |
| 18-3   | 0.81                       |
| 18-11  | 0.31                       |
| 18-12  | 0.97                       |
| 18-14  | 0.67                       |
| 18-15  | 0.77                       |
| 18-28  | 0.99                       |
| 18-60  | 3.05                       |

**Table S3.** Comparison between the IC<sub>50</sub> values (nM) of parasites with *pfmdr1* Y184 or 184F for 11 antimalarial drugs

| Drugs              | IC <sub>50</sub> values in nM (Mean±SD) |                                | P values            |
|--------------------|-----------------------------------------|--------------------------------|---------------------|
|                    | Y184 (N=8)                              | 184F (N=21)                    |                     |
| Dihydroartemisinin | 1.0±0.5                                 | 1.0±0.4                        | 0.9305 <sup>c</sup> |
| Artemether         | 2.5 (1.6-3.4) <sup>a</sup>              | 1.6 (1.3-2.1) <sup>a</sup>     | 0.0724 <sup>b</sup> |
| Artesunate         | 4.3 (2.6-5.6) <sup>a</sup>              | 4.1 (2.4-4.6) <sup>a</sup>     | 0.3737 <sup>b</sup> |
| Lumefantrine       | 2.7±0.7                                 | 2.6±1.1                        | 0.8678 <sup>c</sup> |
| Mefloquine         | 17.9±3.1                                | 17.0±4.8                       | 0.6139 <sup>c</sup> |
| Quinine            | 49.2 (37.6-55.9) <sup>a</sup>           | 51.7 (34.3-80.6) <sup>a</sup>  | 0.7326 <sup>b</sup> |
| Piperaquine        | 4.3±1.1                                 | 4.7±1.2                        | 0.3742 <sup>c</sup> |
| Naphthoquine       | 7.7 (5.8-9.0) <sup>a</sup>              | 7.5 (5.5-11.8) <sup>a</sup>    | 0.8051 <sup>b</sup> |
| Pyronaridine       | 8.9±2.2                                 | 8.1±2.7                        | 0.4724 <sup>c</sup> |
| Chloroquine        | 14.7 (11.9-25.8) <sup>a</sup>           | 15.1 (13.5-18.1) <sup>a</sup>  | 0.7124 <sup>b</sup> |
| Pyrimethamine      | 9976 (265.5-21269) <sup>a</sup>         | 7292 (2379-23619) <sup>a</sup> | 0.4999 <sup>b</sup> |
| PSA(%)#            | 1.9 (1.7-2.0) <sup>a</sup>              | 2.0 (1.6-3.1) <sup>a</sup>     | 0.4934 <sup>b</sup> |
| RSA(%)#            | 0.8±0.3                                 | 0.8±0.2                        | 0.6060 <sup>c</sup> |

<sup>a</sup> These data are not normally distributed and shown as median (IQR). Data were compared using Mann-Whitney U test (<sup>b</sup>) or t-test (<sup>c</sup>).

# RSA and PSA values are percentages (%).

**Table S3.** Comparison between the IC<sub>50</sub> values (nM) of parasites with *pfk13* K189 (wild-type) or 189T/N (mutant) for artemisinin derivatives

| Drugs              | IC <sub>50</sub> values in nM (Mean±SD) |                            | P values            |
|--------------------|-----------------------------------------|----------------------------|---------------------|
|                    | K189 (N=6)                              | 189T/N (N=23)              |                     |
| Dihydroartemisinin | 0.8±0.5                                 | 1.1±0.4                    | 0.2148 <sup>c</sup> |
| RSA(%)             | 0.7±0.3                                 | 0.8±0.2                    | 0.1413 <sup>c</sup> |
| Artemether         | 2.3 (1.5-3.3) <sup>a</sup>              | 1.6 (1.4-2.2) <sup>a</sup> | 0.2833 <sup>b</sup> |
| Artesunate         | 3.5 (1.6-5.0) <sup>a</sup>              | 4.2 (3.2-4.6) <sup>a</sup> | 0.5911 <sup>b</sup> |

<sup>a</sup> These data are not normally distributed and shown as median (IQR). Data were compared using Mann-Whitney U test (<sup>b</sup>) or t-test (<sup>c</sup>).
